# Supplementary material for: Cerebrospinal fluid mitochondrial DNA in neuromyelitis optica spectrum disorder
Source: PubMed Central journal article supplement (PMC5924507; doi:10.1186/s12974-018-1162-0), 2018-04-27
Supplement: 12974_2018_1162_MOESM1_ESM.pdf [file 12974_2018_1162_MOESM1_ESM.pdf]

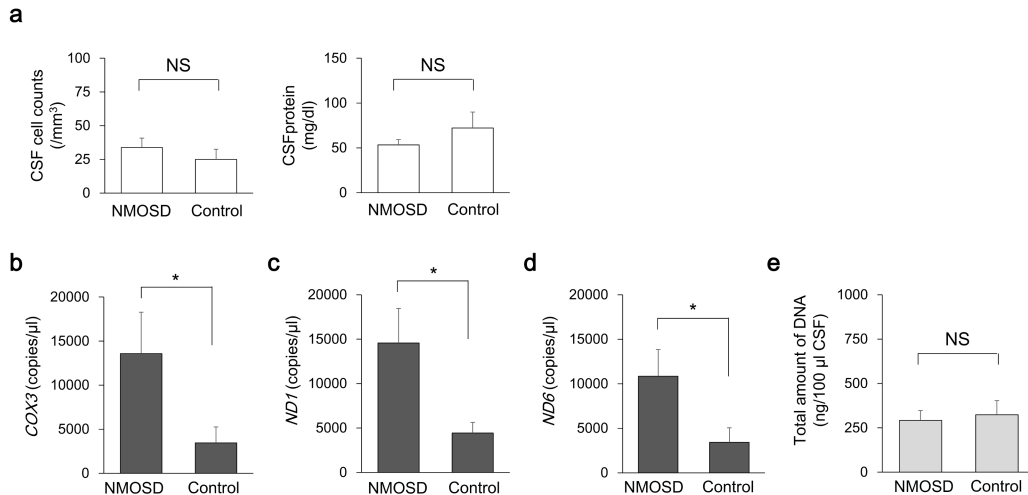

### Fig. S1 mtDNA levels among patients of similar CSF cell counts.

CSF cell counts and protein levels were not significantly different between NMOSD patients (n=6) and controls (total n=4: aseptic meningitis, n=2; GBS, n=1; neuropsychiatric systemic lupus erythematosus, n=1) (cell counts (mean ± SEM): NMOSD, 33.8 ± 6.9 /mm<sup>3</sup>; Control, 25.0 ± 7.4 /mm<sup>3</sup>) (protein (mean ± SEM): NMOSD, 53.3 ± 6.0 mg/dl; Control, 72.2 ± 17.8 mg/dl) (a). mtDNA levels in CSF were significantly higher in patients with NMOSD than in controls (b–d). Total amount of DNA was not significantly different between the two groups (e). \*P<0.05; NS, not significant (P≥0.05).
